# Supplementary material
Source: HighWire-hosted journal article supplement (https://bmjopen.bmj.com/content/9/7/e029502)
Supplement: inline-supplementary-material-2 [file inline-supplementary-material-2.pdf]

**MRC National Survey of Health and Development Neuroimaging sub-study  
PET/MRI Consent Form**

Version 1.2:17-January-2015

**PLEASE INITIAL BOXES – where you agree**

1. I confirm that I have read and understood the participant information sheet (version 2.3 dated 17 January 2015) for the above study and have had the opportunity to ask questions.
2. I understand that my participation is voluntary and that I am free to withdraw at any time, without giving any reason, without my medical care or legal right being affected.
3. I agree to my GP being informed of my participation in the study and that my GP may be informed of any unexpected findings on the research scan.
4. I understand that unexpected findings on the MR scan may be discussed with me.
5. I agree to take part in the study.

\_\_\_\_\_  
Name of study member

\_\_\_\_\_  
Date

\_\_\_\_\_  
Signature

\_\_\_\_\_  
Name of person taking consent

\_\_\_\_\_  
Date

\_\_\_\_\_  
Signature

**Thank you for agreeing to participate in the MRC NSHD Neuroimaging sub-study**

When completed, 1 for study member, 1 for Institute of Neurology, and original for MRC NSHD
