# Supplementary material
Source: HighWire-hosted journal article supplement (https://bmjopen.bmj.com/content/9/7/e029502)
Supplement: inline-supplementary-material-3 [file inline-supplementary-material-3.pdf]

|                                                                                                                 |                                                    |
|-----------------------------------------------------------------------------------------------------------------|----------------------------------------------------|
| Acute brain infarction                                                                                          | <input type="radio"/> No <input type="radio"/> Yes |
| Acute brain haemorrhage                                                                                         | <input type="radio"/> No <input type="radio"/> Yes |
| Intracranial mass lesion                                                                                        | <input type="radio"/> No <input type="radio"/> Yes |
| Suspected intracranial aneurysm or vascular malformation (inc. cavernomata)                                     | <input type="radio"/> No <input type="radio"/> Yes |
| Colloid cyst of the 3rd ventricle                                                                               | <input type="radio"/> No <input type="radio"/> Yes |
| Acute hydrocephalus                                                                                             | <input type="radio"/> No <input type="radio"/> Yes |
| Significant sinus disease with suspicion of underlying pathology (e.g. unilateral sinus opacification)          | <input type="radio"/> No <input type="radio"/> Yes |
| Other unexpected, serious, or life-threatening findings                                                         | <input type="radio"/> No <input type="radio"/> Yes |
| Additional comments                                                                                             | <input type="text"/>                               |
| Flagged For Review                                                                                              | No                                                 |
| <input type="button" value="Save"/> <input type="button" value="Revert"/> <input type="button" value="Cancel"/> |                                                    |
