# Supplementary material
Source: HighWire-hosted journal article supplement (https://bmjopen.bmj.com/content/9/7/e029502)
Supplement: inline-supplementary-material-5 [file inline-supplementary-material-5.pdf]

Supplementary File 5. Data regarding follow-up and subsequent outcomes of incidental findings on brain MRI

| <b>Incidental Finding</b>                                                                                                               | <b>Outcome</b>                                                                                                                                                                       | <b>Source</b>      |
|-----------------------------------------------------------------------------------------------------------------------------------------|--------------------------------------------------------------------------------------------------------------------------------------------------------------------------------------|--------------------|
| Possible aneurysm right ICA                                                                                                             | Known about previously and already being followed up locally.                                                                                                                        | Participant        |
| Probable right MCA bifurcation aneurysm                                                                                                 | Seen by neurosurgery. Did not have further imaging or follow-up.                                                                                                                     | Participant        |
| Possible right PCOMA aneurysm                                                                                                           | Seen by neurosurgery. Had angiogram which showed 8mm right ICA aneurysm. Subsequently underwent endovascular treatment.                                                              | Clinician letter   |
| Left cerebellar cavernoma with previous perinidal haemorrhage                                                                           | No immediate action. Will have follow-up imaging at phase 2 visit.                                                                                                                   | Study documents    |
| ACOMA aneurysm                                                                                                                          | Seen by neurosurgery. Had angiogram. To be repeated in 6 months to assess whether any interval change.                                                                               | Participant        |
| Possible cavernoma left mid cerebellar peduncle                                                                                         | Had contrast CT. Felt to be solitary cavernoma and deemed low risk.                                                                                                                  | Study documents    |
| Multiple T2 hypointense lesions and possible pontine cavernoma                                                                          | Given advice regarding BP control and avoidance of blood-thinners.                                                                                                                   | Study documents    |
| Basilar tip artery aneurysm, partially thrombosed                                                                                       | Seen by neurosurgery. Underwent exploratory endovascular surgery, but no intervention performed. Subsequently died of stroke (aetiology unknown) around 17 months post-visit.        | Participant/family |
| Prominent right thalamostriate vein with smaller adjacent connecting vessels                                                            | Seen by neurology. Further imaging confirmed developmental venous anomaly right frontal area and cavernomata. Given advice regarding BP control and avoidance of blood-thinners.     | Clinician letter   |
| Asymmetric configuration of pituitary fossa with T2-hyperintense signal on the left, and mild deviation of pituitary stalk to the right | Seen by neurosurgery. Further imaging confirmed small pituitary adenoma, which is being followed up with interval imaging.                                                           | Clinician letter   |
| Signal change and mild swelling within medial aspect of right post-central gyrus                                                        | Previous breast cancer. Lung lesion on recent CXR. GP informed oncology re. brain scan abnormality, which in clinical context was felt likely to be a metastasis. Subsequently died. | GP/family          |
| Small median mass at outlet of 4 <sup>th</sup> ventricle without mass effect or hydrocephalus                                           | Seen by neurology. Underwent contrast MRI brain and c-spine. Lesion thought to be subependyoma. Being followed up locally.                                                           | Clinician letter   |
| Small well circumscribed extra-axial lesion centred on the pontine cistern on the left                                                  | Known meningioma. Already under follow-up. No action taken.                                                                                                                          | Participant        |

|                                                                                                                                          |                                                                                                                                                                  |                  |
|------------------------------------------------------------------------------------------------------------------------------------------|------------------------------------------------------------------------------------------------------------------------------------------------------------------|------------------|
| Right frontal parasagittal meningeal sessile mass                                                                                        | Seen by neurology. Contrast MRI confirmed meningioma and follow-up MRI at 1 year showed no interval change.                                                      | Clinician letter |
| Bulky pituitary gland with convex superior border                                                                                        | Seen by neurosurgery. Asymptomatic. Normal pituitary function tests. Baseline and repeat imaging at 1 year showed no interval change. No longer under follow-up. | Participant      |
| Meningioma overlying left cerebellar hemisphere                                                                                          | Seen by neurology. Contrast MRI confirmed meningioma and follow-up MRI at 1 year showed no interval change.                                                      | Clinician letter |
| Right maxillary antrum almost completely filled by retained secretions.                                                                  | Seen by ENT. As asymptomatic, not felt to require further tests.                                                                                                 | Participant      |
| Complete filling left maxillary sinus with expansion of the osteomeatal complex, raising possibility of an underlying obstructing lesion | Seen by ENT. Underwent nasoendoscopy – no underlying structural lesion. Advised nasal irrigation to decrease congestion. Discharged.                             | Participant      |
| Complete opacification of the right maxillary sinus and adjacent nasal cavity                                                            | Seen by ENT. Had an MRI – no evidence of obstructing lesion. Prescribed antibiotics for sinusitis. Discharged.                                                   | Participant      |
| Well circumscribed T1-hyperintense lesion within mandible on right, suggestive of a keratocystic odontogenic tumour                      | Seen by maxillofacial surgery. Tumour excised.                                                                                                                   | Participant      |
| T1-hyperintense lesion within suprasellar cistern, differential of which includes dermoid, craniopharyngioma or ACOM aneurysm            | Seen by neurology. Further imaging suggested lipoma or small dermoid cyst. No further action recommended.                                                        | Clinician letter |
